# Supplementary material for: Ethnic-Specific Obesity Cutoffs for Diabetes Risk: Cross-sectional Study of 490,288 UK Biobank Participants
Source: Oxford University Press journal article supplement (doi:10.2337/dc13-2966), 2014-06-30

# SUPPLEMENTARY DATA

**Supplementary Table 1.** Age-adjusted body mass index and waist circumference cut-offs equivalent to conventional obesity thresholds in Indian and Pakistani ethnic groups.

|       |                          | <b>White</b>                     | <b>Pakistani</b>     | <b>Indian</b>        |
|-------|--------------------------|----------------------------------|----------------------|----------------------|
|       |                          | <b>(reference cut-off value)</b> | <b>mean (95% CI)</b> | <b>mean (95% CI)</b> |
| Women | BMI (kg/m <sup>2</sup> ) | 30.0                             | 21.6 (20.2–23.5)     | 22.3 (21.4–23.3)     |
|       | WC (cm)                  | 88.0                             | 68.0 (65.5–72.0)     | 70.0 (69.0–73.0)     |
| Men   | BMI (kg/m <sup>2</sup> ) | 30.0                             | 21.5 (20.6–22.8)     | 22.0 (21.4–22.9)     |
|       | WC (cm)                  | 102.0                            | 78.0 (75.7–80.7)     | 80.0 (78.3–82.1)     |

**Supplementary Table 2.** Table showing the goodness-of-fit for each model used in analyses by sex.

|     | <b>Female (%)</b> | <b>Male (%)</b> |
|-----|-------------------|-----------------|
| BMI | 77.0              | 76.0            |
| %BF | 74.0              | 74.0            |
| WC  | 78.0              | 76.0            |
| WHR | 78.0              | 75.0            |

BMI body mass index; WC waist circumference; %BF percentage body fat; WHR waist-to-hip-ratio

## SUPPLEMENTARY DATA

**Supplementary Figure 1.** Age-adjusted adiposity cut-points in Indian, Pakistani and White women sub-groups. This figure presents the relationship between diabetes prevalence and body mass index (BMI) by ethnic groups in Indian (solid green line), Pakistani (solid red line) and White (black solid line) women (figure 1a) and men (figure 1b), and the relationship between diabetes prevalence and waist circumference by ethnic groups in Indian (solid green line), Pakistani (solid red line) and White (solid black line) women (figure 1c) and men (figure 1d) showing the equivalent levels of adiposity in each ethnic group compared to the White ethnic group. Results are adjusted for age and stratified by sex.

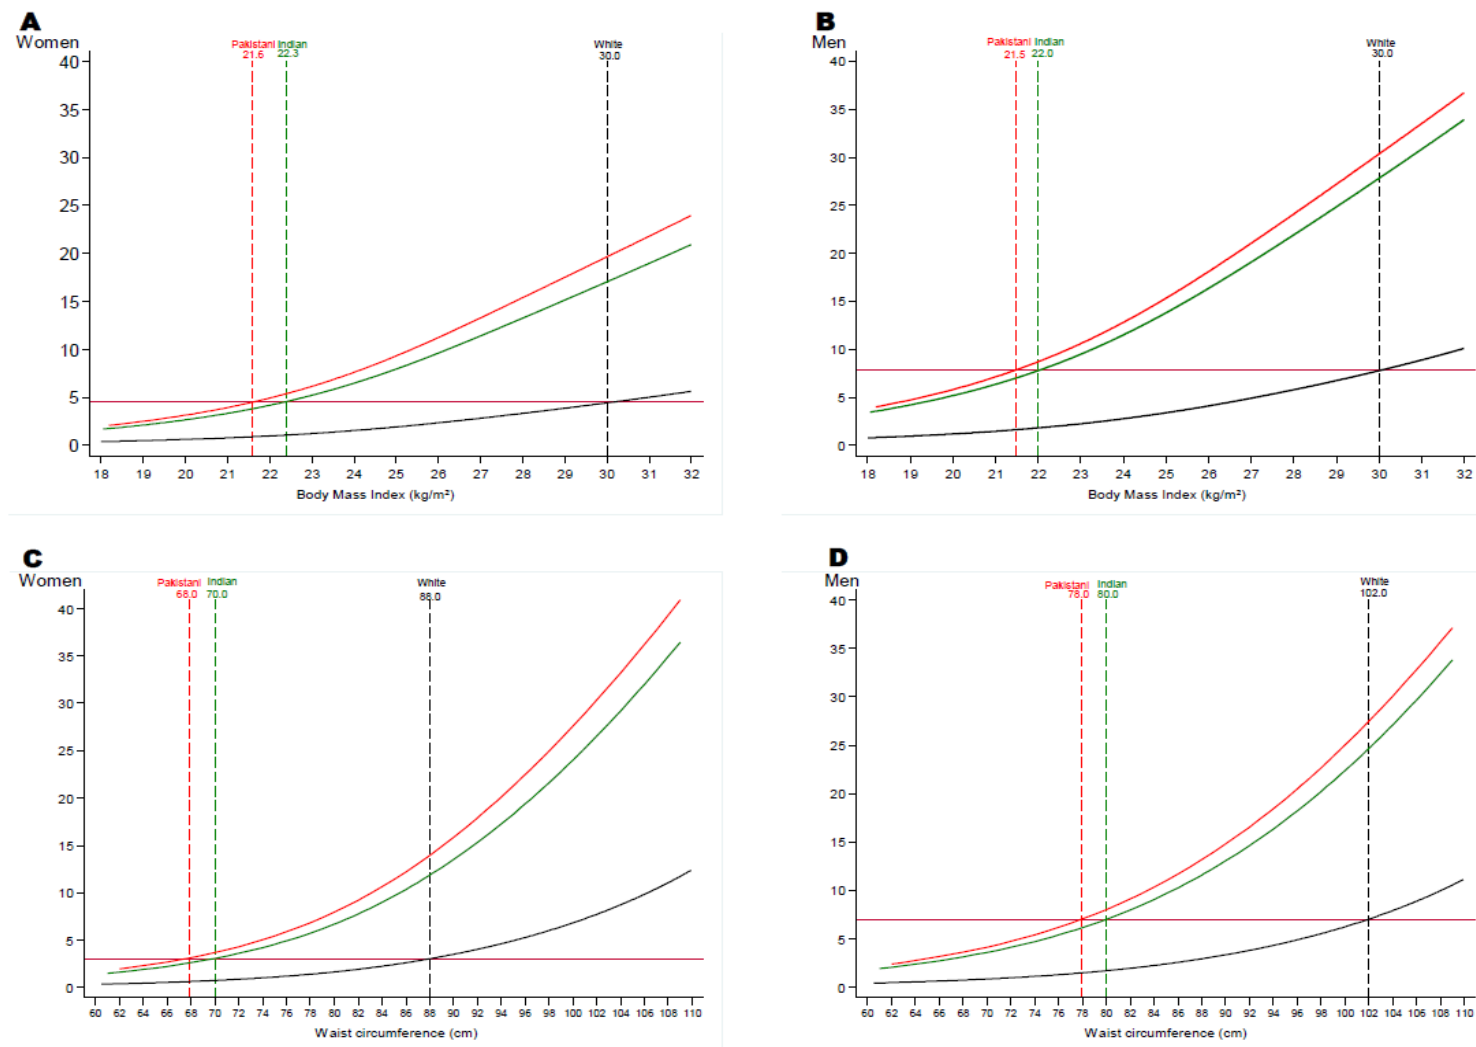

Supplement: dc132966supplementarydata.pdf [file dc132966supplementarydata.pdf]
